# Supplementary material
Source: PubMed Central journal article supplement (PMC5462896)
Supplement: NIHMS840967-supplement-1.pdf [file NIHMS840967-supplement-1.pdf]

**Supplemental Table 1: Description of the program sessions for both parent’s and children’s groups**

| <b>Week</b> | <b>Session</b>      | <b>Parent’s Group</b>                                                                                                                                                                                                                                                             | <b>Children’s Group</b>                                                                                                                                                                                                                                                        |
|-------------|---------------------|-----------------------------------------------------------------------------------------------------------------------------------------------------------------------------------------------------------------------------------------------------------------------------------|--------------------------------------------------------------------------------------------------------------------------------------------------------------------------------------------------------------------------------------------------------------------------------|
| <b>1</b>    | <b>Introduction</b> | <ul style="list-style-type: none"> <li>o Introduce program rationale</li> <li>o Teach measurement of food and calcium calculations</li> <li>o Behavioral modification: sticker charts</li> </ul>                                                                                  | <ul style="list-style-type: none"> <li>o Introduce program rationale</li> <li>o Teach about bone health</li> <li>o Behavioral modification: Sticker charts</li> </ul>                                                                                                          |
| <b>2</b>    | <b>None</b>         | <ul style="list-style-type: none"> <li>o Diet records to be sent back to the dietitian for review and analysis</li> </ul>                                                                                                                                                         | <ul style="list-style-type: none"> <li>o Sticker charts to be returned with diet records</li> </ul>                                                                                                                                                                            |
| <b>3</b>    | <b>Breakfast</b>    | <ul style="list-style-type: none"> <li>o Review food measurement and recording techniques</li> <li>o Teach about bone health and calcium requirements</li> <li>o Focus on breakfast calcium goals</li> <li>o Behavioral modification: differential attention</li> </ul>           | <ul style="list-style-type: none"> <li>o Review sticker charts and award trophies</li> <li>o Learn to read food labels</li> <li>o Try breakfast meal with a reward for achieving breakfast goals</li> <li>o Play games and sign contract for weekly calcium goals</li> </ul>   |
| <b>4</b>    | <b>Lunch</b>        | <ul style="list-style-type: none"> <li>o Review individual records and calcium intake</li> <li>o Focus on lunch calcium goals</li> <li>o Behavioral modification: Using rules and consequences</li> </ul>                                                                         | <ul style="list-style-type: none"> <li>o Review sticker charts and award trophies</li> <li>o Focus on lunch foods with calcium and lunchtime issues</li> <li>o Try lunchtime meal</li> <li>o Do art activity and sign contract for weekly calcium goals</li> </ul>             |
| <b>5</b>    | <b>Dinner</b>       | <ul style="list-style-type: none"> <li>o Review individual records and calcium intake</li> <li>o Focus on dinner calcium goals</li> <li>o Behavioral modification: Privileges</li> </ul>                                                                                          | <ul style="list-style-type: none"> <li>o Review sticker charts and award trophies</li> <li>o Try dinner meal and review calcium in favorite dinner foods</li> <li>o Play game and sign contract for weekly calcium goals</li> </ul>                                            |
| <b>6</b>    | <b>Snack</b>        | <ul style="list-style-type: none"> <li>o Review individual records and calcium intake</li> <li>o Focus on snack calcium goals and overall calcium goals</li> <li>o Teach introduction of new foods</li> <li>o Review maintenance of skills to increase dietary calcium</li> </ul> | <ul style="list-style-type: none"> <li>o Review sticker charts and award trophies</li> <li>o Review favorite snack foods and discuss calcium content</li> <li>o Taste test snack foods</li> <li>o Party activities</li> <li>o Sign contract for weekly calcium goal</li> </ul> |
| <b>7</b>    | <b>None</b>         | <ul style="list-style-type: none"> <li>o Submission of final food records</li> <li>o Mail “booster” information of “ca-boom” and “zoom” foods</li> </ul>                                                                                                                          | <ul style="list-style-type: none"> <li>o Receive final trophy by mail</li> </ul>                                                                                                                                                                                               |
