# Supplementary material
Source: PubMed Central journal article supplement (PMC5462896)

A.

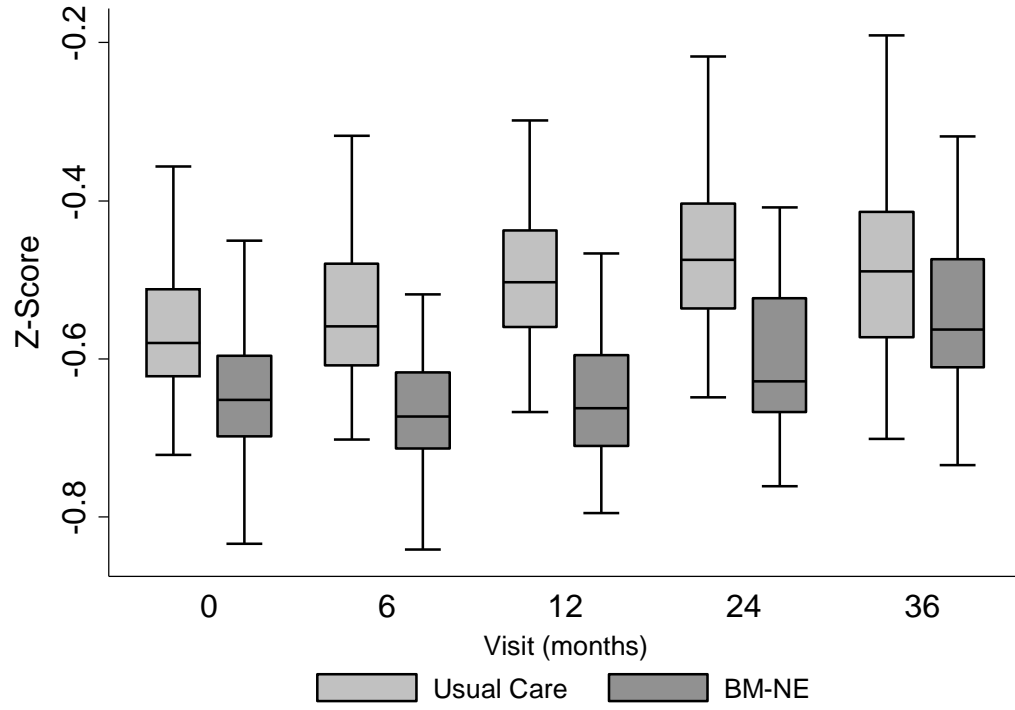

B.

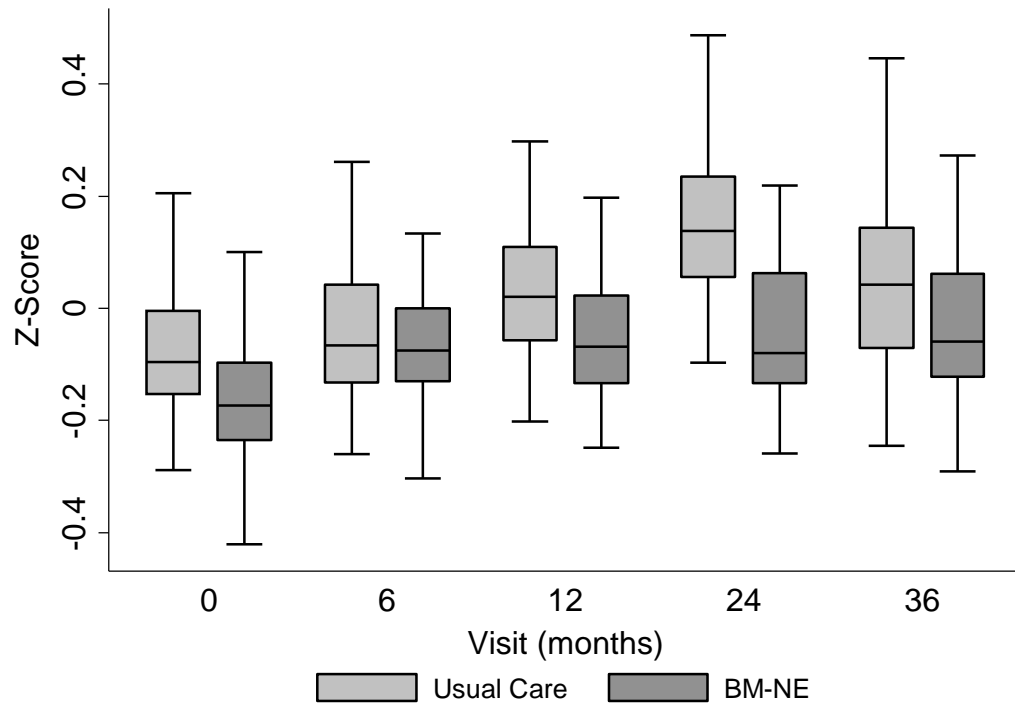

Supplement: NIHMS840967-supplement-3.pdf [file NIHMS840967-supplement-3.pdf]

A.

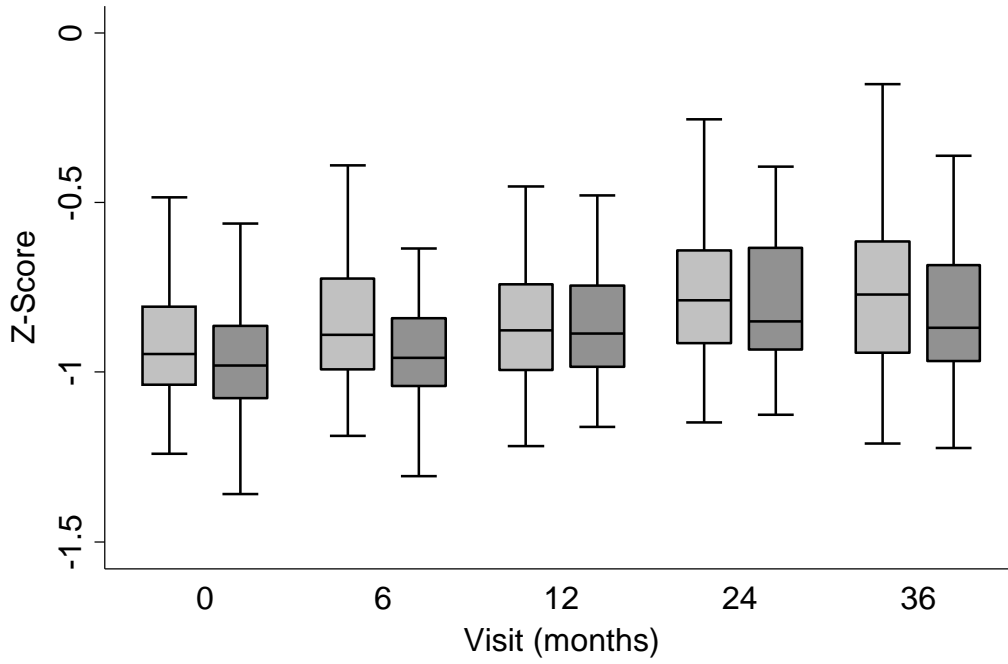

B.

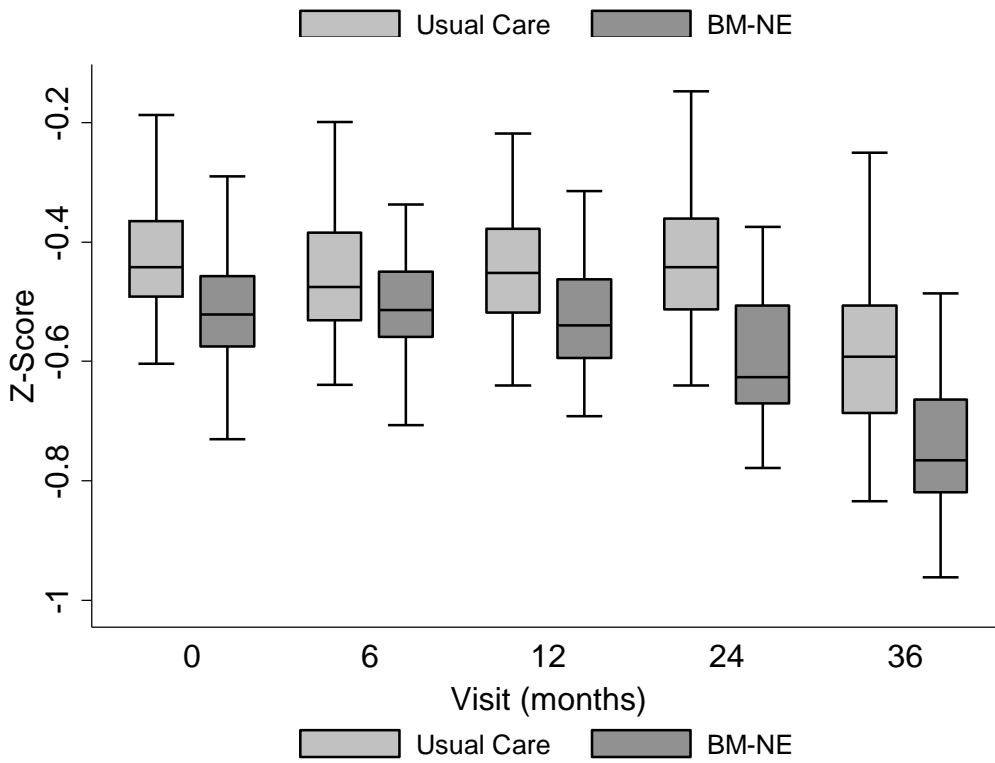

Supplement: NIHMS840967-supplement-4.pdf [file NIHMS840967-supplement-4.pdf]
